# Supplementary material for: A Phylogenetic Study of SPBP and RAI1: Evolutionary Conservation of Chromatin Binding Modules
Source: PubMed Central journal article supplement (PMC3799622; doi:10.1371/journal.pone.0078907), 2013-10-18
Supplement: pone.0078907.s001.pdf [file pone.0078907.s001.pdf]

F box

1 2

Q9UGU0 (1690-1939) QG---PVVTESSVMGHLVCCCLCGKWASYRNMGDLFGPFYFQDYAAT--LP  
G3QDX4 (1690-1939) QG---PVVTESSVMGHLVCCCLCGKWASYRNMGDLFGPFYFQDYAAT--LP  
H2QLT9 (1692-1941) QG---PVVTESSVMGHLVCCCLCGKWASYRNMGDLFGPFYFQDYAAT--LP  
H9FZ14 (1690-1939) QG---PVVTESSVMGHLVCCCLCGKWASYRNMGDLFGPFYFQDYAAT--LP  
G1S175 (1688-1939) QG---PVVTESSVMGHLVCCCLCGKWASYRNMGDLFGPFYFQDYAAT--LP  
H0XML0 (1702-1951) QG---PVVTESSVMGHLVCCCLCGKWASYRNMGDLFGPFYFQDYAAT--LP  
I3NC70 (1718-1966) QG---PVVTESSVMGHLVCCCLCGKWASYRNMGDLFGPFYFQDYAAT--LP  
F7CRS8 (1718-1967) QG---PVVTESSVMGHLVCCCLCGKWASYRNMGDLFGPFYFQDYAAT--LP  
E2RT08 (1689-1938) QG---PVVTESSVMGHLVCCCLCGKWASYRNMGDLFGPFYFQDYAAT--LP  
G1P5A9 (1705-1953) QG---PVVTESSVMGHLVCCCLCGKWASYRNMGDLFGPFYFQDYAAT--LP  
E1B8T3 (1699-1947) QG---PVVTESSVMGHLVCCCLCGKWASYRNMGDLFGPFYFQDYAAT--LP  
G3U8A2 (1705-1954) QG---PVVTESSVMGHLVCCCLCGKWASYRNMGDLFGPFYFQDYAAT--LP  
G1LSB5 (1679-1927) QG---PVVTESSVMGHLVCCCLCGKWASYRNMGDLFGPFYFQDYAAT--LP  
Q9EPQ8 (1718-1962) QG---PVVTESSVMGHLVCCCLCGKWASYRNMGDLFGPFYFQDYAAT--LP  
G1SYZ5 (1632-1880) QG---PVVTESSVMGHLVCCCLCGKWASYRNMGDLFGPFYFQDYAAT--LP  
H0VVM3 (1651-1885) QG---PVVTESSVMGHLVCCCLCGKWASYRNMGDLFGPFYFQDYAAT--LP  
F6Q9R3 (1692-1946) QG---PVVTESSVMGHLVCCCLCGKWASYRNMGDLFGPFYFQDYAAT--LP  
G3WLE0 (1668-1874) QG---PVVTESSVMGHLVCCCLCGKWASYRNMGDLFGPFYFQDYAAT--LP  
H0ZHA4 (1664-1913) QG---PVVTESSVMGHLVCCCLCGKWASYRNMGDLFGPFYFQDYAAT--LP  
E1BXI6 (1671-1920) QG---PVVTESSVMGHLVCCCLCGKWASYRNMGDLFGPFYFQDYAAT--LP  
G1NHL2 (1672-1921) QG---PVVTESSVMGHLVCCCLCGKWASYRNMGDLFGPFYFQDYAAT--LP  
G1KC34 (1689-1937) QG---PVVTESSVMGHLVCCCLCGKWASYRNMGDLFGPFYFQDYAAT--LP  
F7BZK2 (1597-1840) QG---PVVTESSVMGHLVCCCLCGKWASYRNMGDLFGPFYFQDYAAT--LP  
I3JNR0 (1311-1549) SG---PVIETNHSGRLLCCLCQKWANYKHLGDLGPFYFAEYAAK--LP  
D3ZG21 (1722-1965) QG---PVVTESSVMGHLVCCCLCGKWASYRNMGDLFGPFYFQDYAAT--LP  
G7PFP9 (1725-1980) QG---PVVTESSVMGHLVCCCLCGKWASYRNMGDLFGPFYFQDYAAT--LP  
H2P4M2 (1692-1935) QG---PVVTESSVMGHLVCCCLCGKWASYRNMGDLFGPFYFQDYAAT--LP  
H2ZXL0 (1628-1862) QG---PVIETNHSGRLLCCLCQKWANYKHLGDLGPFYFAEYAAK--LP  
G3I0E6 (721-964) QG---PVVTESSVMGHLVCCCLCGKWASYRNMGDLFGPFYFQDYAAT--LP  
G5BPR9 (1037-1303) QG---PVVTESSVMGHLVCCCLCGKWASYRNMGDLFGPFYFQDYAAT--LP  
Q4SCG6 (1995-2332) VG---PVIETNHSGRLLCCLCQKWANYKHLGDLGPFYFAEYAAK--LP  
E7FE16 (2019-2336) PG---PVIETNHSGRLLCCLCQKWANYKHLGDLGPFYFAEYAAK--LP  
F1SRF7 (1698-1893) QG---PVVTESSVMGHLVCCCLCGKWASYRNMGDLFGPFYFQDYAAT--LP  
H9KVS1 (1635-1821) QG---PVVTESSVMGHLVCCCLCGKWASYRNMGDLFGPFYFQDYAAT--LP  
Q7Z5J4 (1672-1906) LG---PVVSKALSTSCLVCCCLQNPANFKDLGDLGPFYFAEYAAK--LP  
H2QCD6 (1667-1901) LG---PVVSKALSTSCLVCCCLQNPANFKDLGDLGPFYFAEYAAK--LP  
F7E488 (1674-1909) LG---PVVSKALSTSCLVCCCLQNPANFKDLGDLGPFYFAEYAAK--LP  
H2NSX0 (1678-1908) LG---PVVSKALSTSCLVCCCLQNPANFKDLGDLGPFYFAEYAAK--LP  
G1RTB7 (1668-1903) LG---PVVSKALSTSCLVCCCLQNPANFKDLGDLGPFYFAEYAAK--LP  
E1B9X1 (1644-1885) LG---PVVSKALSTSCLVCCCLQNPANFKDLGDLGPFYFAEYAAK--LP  
D4A4Z4 (1638-1887) LG---PVVSKALSTSCLVCCCLQNPANFKDLGDLGPFYFAEYAAK--LP  
Q61818 (1640-1889) LG---PVVSKALSTSCLVCCCLQNPANFKDLGDLGPFYFAEYAAK--LP  
G1LF06 (1637-1873) LG---PVVSKALSTSCLVCCCLQNPANFKDLGDLGPFYFAEYAAK--LP  
G3QJR9 (1645-1879) LG---PVVSKALSTSCLVCCCLQNPANFKDLGDLGPFYFAEYAAK--LP  
G3TJ97 (1586-1821) LG---PVVSKALSTSCLVCCCLQNPANFKDLGDLGPFYFAEYAAK--LP  
H0V1B2 (1316-1545) LG---PVVSKALSTSCLVCCCLQNPANFKDLGDLGPFYFAEYAAK--LP  
I3N2I1 (1670-1914) LG---PVVSKALSTSCLVCCCLQNPANFKDLGDLGPFYFAEYAAK--LP  
F7DZK3 (1652-1884) LG---PVVSKALSTSCLVCCCLQNPANFKDLGDLGPFYFAEYAAK--LP  
E1BXD2 (1385-1610) LG---PVVSKALSTSCLVCCCLQNPANFKDLGDLGPFYFAEYAAK--LP  
G3PEF0 (1592-1819) QG---PLVKRDLIDRCLTCLCGKPANYRDLGDLGPFYFAEYAAK--LP  
H3D328 (1531-1756) QG---PVSVEKNQTDSCLTCLCGKPANYRDLGDLGPFYFAEYAAK--LP  
E7F726 (1703-1936) QG---PLVNKSLSDRCLTCLCGKPANYRDLGDLGPFYFAEYAAK--LP  
C3Z7L5 (1697-1932) IGSABE--THPVTHAKWVCFCKGSPNYKHLGDLGPFYFAEYAAK--LP  
E2BIR7 (1229-1457) LS---SRYDAHTPDSTWVCFCKQGPHSVIFGDPSPRPHNLAGPHIASGT  
E2B1Q5 (1212-1434) LS---SRYDAHTTDSTWVCFCKQGPHSVIFGDPSPRPHNLAGPHIATGT  
F4W5Y0 (1113-1335) LS---SRYDAHTTDSTWVCFCKQGPHSVIFGDPSPRPHNLAGPHIATGT  
H9HN29 (1142-1364) LS---SRYDAHTTDSTWVCFCKQGPHSVIFGDPSPRPHNLAGPHIATGT  
H9K8F1 (1148-1369) LS---SRYDAHTTDSTWVCFCKQGPHSVIFGDPSPRPHNLAGPHIATGT  
G1M273 (1318-1538) VG---AQP-GS-----RS-PANYKDLGDLGPFYFAEYAAK--LP  
F6TA33 (1577-1806) LG---PLVCKAVPSGCLVCCCLCRNPANFKDLGDLGPFYFAEYAAK--LP  
G3X2Q6 (1102-1337) LG---PVVSKTLTSAACLVCCLQNPANFKDLGDLGPFYFAEYAAK--LP  
G5BMW5 (1673-1926) LG---PVVSKALSTSCLVCCCLQNPANFKDLGDLGPFYFAEYAAK--LP  
F6R4X5 (1594-1827) LG---PVVSKTLTSAACLVCCLQNPANFKDLGDLGPFYFAEYAAK--LP  
F7B730 (1669-1926) LG---PVVSKALSTSCLVCCCLQNPANFKDLGDLGPFYFAEYAAK--LP  
E2RE72 (1543-1784) LG---PVVSKALSTSCLVCCCLQNPANFKDLGDLGPFYFAEYAAK--LP  
H0Y065 (1671-1929) LG---PVVSKALSTSCLVCCCLQNPANFKDLGDLGPFYFAEYAAK--LP  
H9G548 (1666-1853) LG---PVVSKTLTNAACLVCCLCRNPANFKDLGDLGPFYFAEYAAK--LP  
H3AX41 (1594-1783) LG---PLVLTNLDGCLVCCCLCRNPANFKDLGDLGPFYFAEYAAK--LP  
G1NTH3 (1623-1838) LG---PVVSKALSTSCLVCCCLQNPANFKDLGDLGPFYFAEYAAK--LP  
G3HHP8 (1539-1764) LG---PVVSKALITSCLVCCCLQNPANFKDLGDLGPFYFAEYAAK--LP  
Q6AWG9 (967-1203) LS---NRYDADTTDSTWVCFCKRGPVKHLGDLGPFYFAEYAAK--LP  
Q16VV4 (907-1120) LS---NRYDADTTDSTWVCFCKRGPVKHLGDLGPFYFAEYAAK--LP  
B3NLN9 (1085-1322) LS---NRYDADTTDSTWVCFCKRGPVKHLGDLGPFYFAEYAAK--LP  
B0W5K6 (960-1174) LS---TKYDADTTDASWVCFCKTGPHKMLGDLGPFYFAEYAAK--LP  
A7UTC0 (931-1162) LS---TKYDADTTDSTWVCFCKTGPHKMLGDLGPFYFAEYAAK--LP

E3XES6 (921-1156) IS---TKYDADTTDISWMCVFCCKMGPCHKFRIGDLFGPYIISTASDEYRAS  
B4HNB7 (1026-1264) IS---NRYDADTTDSTWICVFCCKRGPCHKLGLDGLFGPYLVTSDCDEYRAA  
B4QBU9 (866-1104) IS---NRYDADTTDSTWICVFCCKRGPCHKLGLDGLFGPYLVTSDCDEYRAA  
B4J9G8 (1119-1356) IS---NRYDADTTDSSWICVFCCKCGPHKLGDLFGPYLVSIDCEEYRTA  
B4MYL6 (1108-1349) IS---NRYDADTTDSSWICVFCCKRGPCHKLGLDGLFGPYLVSIDCDEYRAA  
B3MHU9 (1048-1286) IS---NRYDADTTDSTWICVFCCKRGPCHKLGLDGLFGPYLVTSDCEEYRAA

Q9UGU0 (1690-1939) KNPBPKRA-----  
G3QDX4 (1690-1939) KNPBPKRA-----  
H2QLT9 (1692-1941) KNPBPKRA-----  
H9FZ14 (1690-1939) KNPBPKRA-----  
G1S175 (1688-1939) KNPBPKRA-----  
H0XML0 (1702-1951) KNPBPKRA-----  
I3NC70 (1718-1966) KNPBPKRA-----  
F7CRS8 (1718-1967) KNPBPKRA-----  
E2RT08 (1689-1938) KNPBPKRA-----  
G1P5A9 (1705-1953) KNPBPKRA-----  
E1B8T3 (1699-1947) KNPBPKRA-----  
G3U8A2 (1705-1954) KNPBPKRA-----  
G1LSB5 (1679-1927) KNPBPKRA-----  
Q9EPQ8 (1718-1962) KNPBPKRS-----  
G1SYZ5 (1632-1880) KNPBPKRA-----  
H0VVM3 (1651-1885) KNLBPKRA-----  
F6Q9R3 (1692-1946) KNPBPKRA-----  
G3WIE0 (1668-1874) KNPBPKRA-----  
H0ZHA4 (1664-1913) KNPBPKRA-----  
E1BXI6 (1671-1920) KNPBPKRA-----  
G1NHL2 (1672-1921) KNPBPKRA-----  
G1KC34 (1689-1937) KNPBPKRA-----  
F7BZK2 (1597-1840) KNPBPKKS-----  
I3JNR0 (1311-1549) KNQPQVRQ-----  
D3ZG21 (1722-1965) KNPBPKRS-----  
G7PFP9 (1725-1980) KNPBPKRA-----  
H2P4M2 (1692-1935) KNPBPKRA-----  
H2ZXL0 (1628-1862) KNPBPKKT-----  
G3IOE6 (721-964) KNPBPKRS-----  
G5BPR9 (1037-1303) KNLBPKRA-----  
Q4SCG6 (1995-2332) KNQPQVRQCQATAGTNKTGPNADII SNTLNSVQDTQTQDAYFTQSDYAIG  
E7FE16 (2019-2336) KNQPQVRQTL SHFGPAATG---MTSIPTEAIPQDTRLQEPQNVKSSAESD  
F1SRF7 (1698-1893) KNPBPKRA-----  
H9KVS1 (1635-1821) KNPBPKRA-----  
Q7Z5J4 (1672-1906) LKEKVRPEGTC-----  
H2QCD6 (1667-1901) LKEKVRPEGTC-----  
F7E488 (1674-1909) LKEKVRPEGTC-----  
H2NSX0 (1678-1908) LKEKVRPEGTC-----  
G1RTB7 (1668-1903) LKEKVRPEGTC-----  
E1B9X1 (1644-1885) LKEKVRLEGTC-----  
D4A4Z4 (1638-1887) LKEKVRLEGTL-----  
Q61818 (1640-1889) LKEKARLEGTL-----  
G1LF06 (1637-1873) LKEKVRPEGPC-----  
G3QJR9 (1645-1879) LKEKVRPEGTC-----  
G3TJ97 (1586-1821) LKEKVRLEGAC-----  
H0V1B2 (1316-1545) LKEKVRPEGTC-----  
I3N2I1 (1670-1914) LKEKVRPEGTC-----  
F7DZK3 (1652-1884) FKEKVRPEGIC-----  
E1BXD2 (1385-1610) LKEKARVEGE-----  
G3PEF0 (1592-1819) VCPTESIREDS-----  
H3D328 (1531-1756) IKHBEHLRNES-----  
E7F726 (1703-1936) LTHRSEFRQNS-----  
C3Z7L5 (1697-1932) QTKTPPK-----  
E2BIR7 (1229-1457) YTVPA-----  
E2B1Q5 (1212-1434) YTVPA-----  
F4W5Y0 (1113-1335) YTVPA-----  
H9HN29 (1142-1364) YTVPA-----  
H9K8F1 (1148-1369) YTVPA-----  
G1MZ73 (1318-1538) LKEKARAEGE-----  
F6TA33 (1577-1806) PKDKFR---I-----  
G3X2Q6 (1102-1337) LKEKARAEGPG-----  
G5BMW5 (1673-1926) LKEKVRPEGTC-----  
F6R4X5 (1594-1827) PKEKARAEGLG-----  
F7B730 (1669-1926) LKEKVRPESTC-----  
E2RE72 (1543-1784) LKEKVRPEGTC-----  
H0Y065 (1671-1929) LKEKVRPEGTC-----  
H9G548 (1666-1853) LKEKIKVDGLS-----  
H3AX41 (1594-1783) IKERKLLDASK-----

G1NTH3 (1623-1838) LKEKVRLEGTC-----  
G3HHP8 (1539-1764) LKEKVRLECAF-----  
Q6AWG9 (967-1203) VQTEG-----  
Q16VV4 (907-1120) QTDEE-----  
B3NLN9 (1085-1322) VQAFG-----  
B0W5K6 (960-1174) KTDQD-----  
A7UTC0 (931-1162) QVDVD-----  
E3XES6 (921-1156) QVDVD-----  
B4HNB7 (1026-1264) VQTEG-----  
B4QBU9 (866-1104) VQAFG-----  
B4J9G8 (1119-1356) VQVPA-----  
B4MYL6 (1108-1349) LHSE-----  
B3MHU9 (1048-1286) LQAF-----

Q9UGU0 (1690-1939) -----TQMOSKVKVRHKSASNGS-----  
G3QDX4 (1690-1939) -----TQMOSKVKVRHKSASNGS-----  
H2QLT9 (1692-1941) -----TQMOSKVKVRHKSASNGS-----  
H9FZ14 (1690-1939) -----TQMOSKVKVRHKSASNGS-----  
G1S175 (1688-1939) -----TQMOSKVKVRHKSASNGS-----  
H0XML0 (1702-1951) -----SFMOSKVKVRHKSASNGS-----  
I3NC70 (1718-1966) -----TQMOSKVKVRHKSASNGS-----  
F7CRS8 (1718-1967) -----MFMOSKVKVRHKSASNGS-----  
E2RT08 (1689-1938) -----TQMOSKVKVRHKSASNGS-----  
G1P5A9 (1705-1953) -----TQMOSKVKVRHKSASNGS-----  
E1B8T3 (1699-1947) -----AFMOSKVKVRHKSASNGS-----  
G3UBA2 (1705-1954) -----TQMOSKVKVRHKSASNGS-----  
G1LSB5 (1679-1927) -----TQMOSKVKVRHKSASNGS-----  
Q9EPQ8 (1718-1962) -----SFMOSKVKVRHKSASNGS-----  
G1SYZ5 (1632-1880) -----AFMOSKVKVRHKSASNGS-----  
H0VVM3 (1651-1885) -----TQMOSKVKVRHKSASNGS-----  
F6Q9R3 (1692-1946) -----TQMOSKVKVRHKSASNGS-----  
G3WIE0 (1668-1874) -----TQMOSKVKVRHKSASNGS-----  
H0ZHA4 (1664-1913) -----TQMOSKVKVRHKSASNGS-----  
E1BXI6 (1671-1920) -----TQMOSKVKVRHKSASNGS-----  
G1NHL2 (1672-1921) -----TQMOSKVKVRHKSASNGS-----  
G1KC34 (1689-1937) -----TQMOSKVKVRHKSASNGS-----  
F7BZK2 (1597-1840) -----SFTPRKVKVRHKSASNGS-----  
I3JNR0 (1311-1549) -----SGREEMMTHVADKHSNAASSSSSSSSSS-----  
D3ZG21 (1722-1965) -----TQMOSKVKVRHKSASNGS-----  
G7PFP9 (1725-1980) -----TQMOSKVKVRHKSASNGS-----  
H2P4M2 (1692-1935) -----TQMOSKVKVRHKSASNGS-----  
H2ZXL0 (1628-1862) -----TETQGRVKVRHKSASNGS-----  
G3IOE6 (721-964) -----TQMOSKVKVRHKSASNGS-----  
G5BPR9 (1037-1303) -----TQMOSKVKVRHKSASNGS-----  
Q4SCG6 (1995-2332) MDSTSLAAALRPVSTATRETTMTHLAGRFNTASSSSPSSSSSSSHALSK-----  
E7FE16 (2019-2336) CTVSQATNTTSPATIIGTVSPMP-LEMPFONAIASSSTARVTTHAWDTAA-----  
F1SRF7 (1698-1893) -----TQMOSKVKVRHKSASNGS-----  
H9KVS1 (1635-1821) -----TQMOSKVKVRHKSASNGS-----  
Q7Z5J4 (1672-1906) -----EASLPLERTLKGPECAAAA-----  
H2QCD6 (1667-1901) -----EASLPLERTLKGPECAAAA-----  
F7E488 (1674-1909) -----EASLPLERTLKGPECAATT-----  
H2NSX0 (1678-1908) -----EAS-LPLE-TLK-PECAAAA-----  
G1RTB7 (1668-1903) -----EASLPLERTLKGPDCAAAA-----  
E1B9X1 (1644-1885) -----EASLPLERTLKGPECAAAA-----  
D4A4Z4 (1638-1887) -----EASLPLERTLKGLECAASTTAATP-----  
Q61818 (1640-1889) -----EASLPLERTLKGLECAASTTAAP-----  
G1LF06 (1637-1873) -----EASLPLERTLKGLECAATAA-----  
G3QJR9 (1645-1879) -----EASLPLERTLKGPECAAAA-----  
G3TJ97 (1586-1821) -----EASLPLERTLKGLECAVAAT-----  
H0V1B2 (1316-1545) -----EASLPLERTLKGLECA-----  
I3N2I1 (1670-1914) -----EASLPLERTLKGLECAAPVAAA-----  
F7DZK3 (1652-1884) -----EASLPLERTLKGLECAAAA-----  
E1BXD2 (1385-1610) -----EGGAAERPRGAAESSWVAG-----  
G3PEF0 (1592-1819) -----QKTNPNNGSSSEPPSSKNEGES-----  
H3D328 (1531-1756) -----QKTDGHSNGNDEVPGCCSSEGAE-----  
E7F726 (1703-1936) -----NCANETESSIVKNTQSVCEEAI-----  
C3Z7L5 (1697-1932) -----QSADLKENKVRKSRSRNPS-----  
E2BIR7 (1229-1457) -----GVSGDLFGPYLIGKDRLE-----  
E2BLQ5 (1212-1434) -----GVLGDLFGPYLIGK-----  
F4W5Y0 (1113-1335) -----GVLSDLFGPYLIGK-----  
H9HN29 (1142-1364) -----GVLSDLFGPYLIGK-----  
H9K8F1 (1148-1369) -----GVLSDLFGPYLIGK-----  
G1MZ73 (1318-1538) -----EGGAAERPRGVAESSWAAG-----  
F6TA33 (1577-1806) -----AEAPAEKAAKRVSDSVCTVGS-----  
G3X2Q6 (1102-1337) -----EASLPLERTLKGLECAATAA-----

G5BMW5 (1673-1926) -----EAPLPLERTLKGLECV-----  
F6R4X5 (1594-1827) -----EDAAAPDRTRLRALESPCPAG-----  
F7B730 (1669-1926) -----EETSLPLERTLKGPECAAAA-----  
E2RE72 (1543-1784) -----EASPLPLERTLKDLECVAAATG-----  
H0Y065 (1671-1929) -----EASLPLERTLKGLECAAAA-----  
H9G548 (1666-1853) -----EPPSLSLKLVSTDNNCSG-----  
H3AX41 (1594-1783) -----AERLKLPLPSES VATETNDKSLLS-----  
G1NTH3 (1623-1838) -----EASLPLERTLKGLECAAAA-----  
G3HHP8 (1539-1764) -----EETSLPLERTLKGLECAAS-----  
Q6AWG9 (967-1203) -----AQDIDGMFVNKRREDMVKQERNL-----  
Q16VV4 (907-1120) -----YFNVKRTRESLQSKLIK-----  
B3NLN9 (1085-1322) -----AQDIDGLFVNKRREDMVKQERNL-----  
B0W5K6 (960-1174) -----YFSEKRTRESLASKLVQP-----  
A7UTC0 (931-1162) -----FFSVRRTREDLESSQAKQR-----  
E3XES6 (921-1156) -----YFSVKRSRDSMESTQAKER-----  
B4HNB7 (1026-1264) -----AQDIDGLFVNKRREDMVKQERNL-----  
B4QBU9 (866-1104) -----AQDIDGLFVNKRREDMVKQERNL-----  
B4J9G8 (1119-1356) -----SNDIDGLFVSKRRKADMKLQERNL-----  
B4MYL6 (1108-1349) -----VQDIDGLFVSKRRKGMVKAQQRNL-----  
B3MHU9 (1048-1286) -----VQDIDGLFVSKRRREDMVKVQERNL-----

Q9UGU0 (1690-1939) -----KTDTEEEEEQQQQKEQ-----  
G3QDX4 (1690-1939) -----KTDTEEEEEQQQQKEQ-----  
H2QLT9 (1692-1941) -----KTDTEEEEEQQQQKEQ-----  
H9FZ14 (1690-1939) -----KTDTEEEEEQQQQKEQ-----  
G1S175 (1688-1939) -----KTDTEEEEEQQQQKEQ-----  
H0XML0 (1702-1951) -----KTDTEEEEEQQQQKEQ-----  
I3NC70 (1718-1966) -----KTDTEEEEEQQQQ-KEQ-----  
F7CRS8 (1718-1967) -----KTDTEEEEEQQQQKEQ-----  
E2RT08 (1689-1938) -----KTDTEEEEEQQQQKEQ-----  
G1P5A9 (1705-1953) -----KTDTEEEEE-QQQQKEQ-----  
E1B8T3 (1699-1947) -----KTDTEEEEEQQQQ-KEQ-----  
G3U8A2 (1705-1954) -----KTDTEEEERQQQQKEQ-----  
G1LSB5 (1679-1927) -----KTDTE-EEDEQQQQKEQ-----  
Q9EPQ8 (1718-1962) -----KTDTEEEEEQQQQ-KEQ-----  
G1SYZ5 (1632-1880) -----KTDTEEEEEQQQQ-KEQ-----  
H0VVM3 (1651-1885) -----KTDTE-----  
F6Q9R3 (1692-1946) -----KTDTEEEEEEEEQKEQ-----  
G3WIE0 (1668-1874) -----KTDTEEEEEEEEE-----  
H0ZHA4 (1664-1913) -----KTDTEEEEEQQQQ-KEQ-----  
E1BXI6 (1671-1920) -----KTDTEEEEEQQQQ-KEQ-----  
G1NHL2 (1672-1921) -----KTDTEEEEEQQQQ-KEQ-----  
G1KC34 (1689-1937) -----KTDTEEEEEQQQ-KEQ-----  
F7BZK2 (1597-1840) -----SDSDEEEEEEPQQAREQ-----  
I3JNR0 (1311-1549) -----YEAQQRPQH-----  
D3ZG21 (1722-1965) -----KTDTEEEEEQQQQKEQ-----  
G7PFP9 (1725-1980) -----KTDTEEEEEQQQQKEQ-----  
H2P4M2 (1692-1935) -----KTDTEEEEEQQQQKEQ-----  
H2ZXL0 (1628-1862) -----KTDSEDEP-----KEQ-----  
G3I0E6 (721-964) -----KTDTEEEEEQQQQKEQ-----  
G5BPR9 (1037-1303) -----KTDTEEEEEQQ-----KEQ-----  
Q4SCG6 (1995-2332) -----PTSLTWDTSLDIHPVPELKKKEADADGEPQWPKQPQLQPPDEAQQRPQH-----  
E7FE16 (2019-2336) -----ELESGLGTSNLQETDAEIASKQLQVRESSQQRPQH-----  
F1SRF7 (1698-1893) -----KTDTEEEEEQQQQKEQ-----  
H9KVS1 (1635-1821) -----KTDTEEEEE-----  
Q7Z5J4 (1672-1906) -----TAGKPPRP-----  
H2QCD6 (1667-1901) -----TAGKPPRP-----  
F7E488 (1674-1909) -----AAGKPPRP-----  
H2NSX0 (1678-1908) -----AAGKPPRP-----  
G1RTB7 (1668-1903) -----AAGKPPRP-----  
E1B9X1 (1644-1885) -----AATTTTGKPPRP-----  
D4A4Z4 (1638-1887) -----TTTTTTTTTLGRLSRP-----  
Q61818 (1640-1889) -----TTATITPTALGRLSRP-----  
G1LF06 (1637-1873) -----P-----GKPPRP-----  
G3QJR9 (1645-1879) -----TAGKPPRP-----  
G3TJ97 (1586-1821) -----AGKPPRP-----  
H0V1B2 (1316-1545) -----GKPPRL-----  
I3N2I1 (1670-1914) -----AAAATTTTTTAGKPPRP-----  
F7DZK3 (1652-1884) -----AT-----GKPPRP-----  
E1BXD2 (1385-1610) -----GRAGRP-----  
G3PEF0 (1592-1819) -----STEKEDN-----  
H3D328 (1531-1756) -----GGAEKDG-----  
E7F726 (1703-1936) -----HQEKANEGH-----  
C3Z7L5 (1697-1932) -----EVSGSEPKPGPSGL-----  
E2BIR7 (1229-1457) -----DGKERLEDGI-----

E2B1Q5 (1212-1434) -----ERLEDGI  
F4W5Y0 (1113-1335) -----ERLEDGI  
H9HN29 (1142-1364) -----ERLEDGI  
H9K8F1 (1148-1369) -----ERLEDGI  
G1M273 (1318-1538) -----GRAGRQ-  
F6TA33 (1577-1806) -----GRAPCS D  
G3X2Q6 (1102-1337) -----GKPPRP-  
G5BMW5 (1673-1926) -----ATPAAAATGSGKPPRL-  
F6R4X5 (1594-1827) -----KPPRPD  
F7B730 (1669-1926) -----TAGKPPRP-  
E2RE72 (1543-1784) -----ATAAGKPPRP-  
H0Y065 (1671-1929) -----APGKPSRP-  
H9G548 (1666-1853) -----GKSPRL-  
H3AX41 (1594-1783) -----IEENQPRL-  
G1NTH3 (1623-1838) -----ASKAPRP-  
G3HHP8 (1539-1764) -----TTTTTTTTTLGRLSRP-  
Q6AWG9 (967-1203) -----PAVPATLANI  
Q16VV4 (907-1120) -----KEE  
B3NLN9 (1085-1322) -----PAVPATLATI  
B0W5K6 (960-1174) -----KVE  
A7UTC0 (931-1162) -----RAAEKLKEQQ  
E3XES6 (921-1156) -----RMAEQKQQR  
B4HNB7 (1026-1264) -----PAVPATLAYI  
B4QBU9 (866-1104) -----PAVPATLANI  
B4J9G8 (1119-1356) -----PVVPATLANI  
B4MYL6 (1108-1349) -----PVVQASLANI  
B3MHU9 (1048-1286) -----PVVPATLATI

Q9UGU0 (1690-1939) RSLAAHPRFKRRHRSEDCCGPRSLSRGLPCKKAATEGSS----EKTVLD  
G3QDX4 (1690-1939) RSLAAHPRFKRRHRSEDCCGPRSLSRGLPCKKAATEGSS----EKTVLD  
H2QLT9 (1692-1941) RSLAAHPRFKRRHRSEDCCGPRSLSRGLPCKKAATEGSS----EKTVLD  
H9F214 (1690-1939) RSLAAHPRFKRRHRSEDCCGPRSLSRGLPCKKAATEGSS----EKTVLD  
G1S175 (1688-1939) RSLATHPRFKRRHRSEDCCGPRSLSRGLPCKKAATEGSS----EKTVLD  
H0XML0 (1702-1951) RSLATHPRFKRRHRSEDCCGPRSLSRGLPCKKAATEGSS----EKTALD  
I3NC70 (1718-1966) RSLAAHPRFKRRHRSEDCCGPRSLSRGLPCKKAATEGSS----EKTVLD  
F7CRS8 (1718-1967) RSLAAHPRFKRRHRSEDCCGPRSLSRGLPCKKAATEGSS----EKTVLD  
E2RT08 (1689-1938) RSLAAHPRFKRRHRSEDCS CGPRSLSRGLPCKKAATEGSS----DKTALD  
G1P5A9 (1705-1953) RSLAAHPRFKRRHRSEDCCGPRSLARGLPCKKAATEGSS----EKTVLD  
E1B8T3 (1699-1947) RSLAAHPRFKRRHRSEDCAGPRSLSRGLPCKKAATEGSS----EKTVLD  
G3U8A2 (1705-1954) RSLAAHPRFKRRHRSEDCCGPRSLSRGLPCKKAATEGSS----EKTALD  
G1LSB5 (1679-1927) RSLAAHPRFKRRHRSEDCCGPRSLSRGLPCKKAATEGSS----EKTALD  
Q9EPQ8 (1718-1962) RSLAAHPRFKRRHRSEDCCGPRSLSRGLPCKKAATEGSS----EKTVSD  
G1SYZ5 (1632-1880) RSLAAHPRFKRRHRSEDCCGPRSLSRGLPCKKAAAEAGSS----EKTALD  
H0VVM3 (1651-1885) --LAHPRFKRRHRSEDCCGPRSLSRGLPCKKAATEGSS----EKTVLD  
F6Q9R3 (1692-1946) RSLAAHPRFKRRHRSEDCSCTPRSLSRGIPCKKATIEGGSGSNEKTPSD  
G3WIE0 (1668-1874) -----EPQPSD  
H0ZHA4 (1664-1913) RSLAAHPRFKRRHRSEDCS CASRSLSRGASCKKATTDGGSGG--EKTPLD  
E1BXI6 (1671-1920) RSLAAHPRFKRRHRSEDCS CASRSLSRGASCKKATEGGSGG--EKTPLD  
G1NHL2 (1672-1921) RSLAAHPRFKRRHRSEDCS CASRSLSRGASCKKATEGGSGG--EKTPLD  
G1KC34 (1689-1937) RSLTAHPRFKRRHRSEDCASRSLSRGAA CKKATTEVGNVG--EKT PSD  
F7BZK2 (1597-1840) RSLTAHPRFKRRHRSGDCTSSRLT----VPSHRKTTDPSE----LTPMD  
I3JNR0 (1311-1549) RKLTSHPRFKRRHKSS E-----DSPRMV PANSKASLPFQ-----  
D3ZG21 (1722-1965) RSLAAHPRFKRRHRSEDCCGPRSLSRGLPCKKAAAEAGSS----EKTASD  
G7PFP9 (1725-1980) RSLAAHPRFKRRHRSEDCCGPRSLSRGLPCKKAATEGSS----EKTVLD  
H2P4M2 (1692-1935) RSLAAHPRFKRRHRSEDCCGPRSLSRGLPCKKAATEGSS----EKTVLD  
H2ZXL0 (1628-1862) RSLPAHPRFKRRHRSEDLG--SPRSIARGATCRKPPSDTCG----KSPTD  
G3IOE6 (721-964) RSLAAHPRFKRRHRSEDCCGPRSLSRGLPCKKAATEGSC----EKAVLD  
G5BPR9 (1037-1303) RSLAAHPRFKRRHRSEDCCGPRSLSRGLPCKKAATEGSS----EKTILD  
Q4SCG6 (1995-2332) RKLTSHPRFKRRHKSS E-----DCPRMVPSNSKASLPFQ-----  
E7FE16 (2019-2336) RKLTSHPRFKRRHKSS E-----DPRTVPINSKASLPFQ-----  
F1SRF7 (1698-1893) RSLAAHPRFKRRHRSEDCCGPRSLSRGLPCKKATEGSS----EKTALD  
H9KVS1 (1635-1821) RSLAAHPRFKRRHRSEDCCGPRSLSRGLPCKKAATEGSS----EKTVLD  
Q7Z5J4 (1672-1906) --DGPADPAKOGPLRTSARCLSRRLQSCYCCDGRDGG E-----EA  
H2QC D6 (1667-1901) --DGPADPAKOGPLRTSARCLSRRLQSCYCCDGRDGG E-----EA  
F7E488 (1674-1909) --DGPADPAKOGPLRTSARCLSRRLQSCYCCDGRDGG E-----EA  
H2NSX0 (1678-1908) --DGPADPAKOGPLRTSARCLSRRLQSCYCCDGRDGG E-----EA  
G1RTE7 (1668-1903) --DGSADPAKOGPLRTSARCLSRRLQSCYCCDGRDGG E-----EA  
E1B9X1 (1644-1885) --DGPADPAKOGSLRTSARCLSRRLQSCYCCDGRDGGSE-----EA  
D4A4Z4 (1638-1887) --DGPADPAKOGSLRTSARCLSRRLQSCYCCDGGQDGG E-----EV  
Q61818 (1640-1889) --DGPADPAKOGPLRTSARCLSRRLQSCYCCDGGQDGG E-----EV  
G1LFO6 (1637-1873) --EGPADPAKOGSLRTSARCLSRRLQSCYCCDGRDGG E-----EA  
G3QJR9 (1645-1879) --DGPADPAKOGPLRTSARCLSRRLQSCYCCDGRDGG E-----EA  
G3TJ97 (1586-1821) --DGPADPAKOGSLRTSARCLSRRLQSCYCCDGGQDGG E-----EA  
H0V1B2 (1316-1545) --DGPADPAKOGSLRTSARCLSRRLQSCYCCDGRDGG E-----EM  
I3N2I1 (1670-1914) --DGPADPAKOGSLRTSARCLSRRLQSCYCCDGRDGG E-----EV

F7DZK3 (1652-1884) --DGPADPAKQGSVVRTSARCLSRRLQSCYCCDGRGDSCE-----EV  
E1BXD2 (1385-1610) --EGAAEPGKPSVLRSSPRCVFRRLLQSCYCCDERTEGE-----EA  
G3PEF0 (1592-1819) --SETTTOEEGGPRRITLREFRFRMKQLRA--ISAAASS-----  
H3D328 (1531-1756) --PETSTQE--GPRRLTLQERLRRMQLOA--GGTRSPS-----  
E7F726 (1703-1936) SRRSKRAIRELSRTRPSSRMRFKRLILIQSRLSGASPPA-----  
C3Z7L5 (1697-1932) SSPANTPLSKRHRHSQ-----SGGEGRKAHAKGGA-----  
E2BIR7 (1229-1457) LSADQEITTEQKKGG---KNKRSIRYAGLADQFSAKMGKK-----K  
E2B1Q5 (1212-1434) LSADQEITTEQKKGG---KNKRSIRYAGLADQFSAKMGKK-----K  
F4W5Y0 (1113-1335) LSADQEITTEQKKGG---KNKRSIRYAGLADQFSAKMGKK-----K  
H9HN29 (1142-1364) LSADQEITTEQKKGG---KNKRSIRYAGLADQFSAKMGKK-----K  
H9K8F1 (1148-1369) LSADQEITTEQKKGG---KNKRSIRYAGLADQFTAKMGKK-----K  
G1M273 (1318-1538) --EAAAEPSKPGVLRSSPRCVFRRLLQSCYCCDERTEGE-----EA  
G6TA33 (1577-1806) --VGELDPSKHNNLRTSARCLSRRLQSCYCCSKTVEIAE-----  
G3X2Q6 (1102-1337) --EAPAEAAKPSLRSRSLYRKLQSCYCCDEQRTED-----EA  
G5BMW5 (1673-1926) --DAPADPAKQSSLRTSARCLSRRLQSCYCCDGRGDGCD-----EM  
F6R4X5 (1594-1827) --VAAADSTKPSALRSSRCLYRKLQSCYCCDEQRTED-----EE  
F7B730 (1669-1926) --DGPADPAKQGPLRTSARCLSRRLQSCYCCDGRGDGCE-----EA  
E2RE72 (1543-1784) --EGPADPAKQGSRLTSARCLSRRLQSCYCCDARGDGC-----EA  
H0Y065 (1671-1929) --DGPADPAKQGSRLTSARCLSRRLQSCYCCDGRGDGCE-----EV  
H9G548 (1666-1853) --DTGAESAQSTLRSRSLMFRKLQSCYCCDERTEGEDT-----AA  
H3AX41 (1594-1783) --DSTSDITKTSVGRSSRCLCRKQSCYCCDSKSEDTE-----  
G1NTH3 (1623-1838) --DGSADPAKQGSRLTSARCLSRRLQSCYCCDGRGDGCE-----EV  
G3HHP8 (1539-1764) --DGPADPAKQGSRLTSARCLSRRLQSCYCCDQGDGCE-----EV  
Q6AWG9 (967-1203) MQAPKISMHRKRKQ---THDSSISYSDDPNESRSQCSS-----  
Q16VV4 (907-1120) PVAGTSNSKSKRKP---TEAANPPAVPSTSVAPPDPA-----  
B3NLN9 (1085-1322) MQAPKISMHRKRKQ---THDSSISYSDDPNETRSQCSS-----  
B0W5K6 (960-1174) PTAG-SGTSKSKRKS---EPTASTSSAVAAAPPPLTATV-----  
A7UTC0 (931-1162) QQGGP---KGGKRKNAAG---AAAAPGAPAGPSSAKAMALK-----  
E3XES6 (921-1156) QQAASGSGKGRKRKN---AASATNNAQAPSTSNCPAVLK-----  
B4HNB7 (1026-1264) MQAPKISMHRKRKQ---THDSSISYSDDPNESRSQCSS-----  
B4QBU9 (866-1104) MQAPKISMHRKRKQ---THDSSISYSDDPNESRSQCSS-----  
B4J9G8 (1119-1356) MQAPKITMHRKRKQ---THDSVYSCSDDPNE--SQCSS-----  
B4MYL6 (1108-1349) MQAPKISMHRKRKQP---AQDCNNSFSDQFDMQSRCSSS-----M  
B3MHU9 (1048-1286) MQAPKISMHRKRKQ---THDSQVYSDDPNESRSQCSS-----

3 4

Q9UGU0 (1690-1939) SKPSVPTTSEGGPELEL-QIPELPLDSNERVWHECCILWANGIYLVCGRL  
G3QDX4 (1690-1939) SKPSVPTTSEGGPELEL-QIPELPLDSNERVWHECCILWANGIYLVCGRL  
H2QLT9 (1692-1941) SKPSVPTTSEGGPELEL-QIPELPLDSNERVWHECCILWANGIYLVCGRL  
H9F214 (1690-1939) SKPSVPTTSEGGPELEL-QIPELPLDSNERVWHECCILWANGIYLVCGRL  
G1S175 (1688-1939) SKPSVPTTSEGGPELEL-QIPELPLDSNERVWHECCILWANGIYLVCGRL  
H0XML0 (1702-1951) SKPSVPTTSEGGPELEL-QIPELPLDSNERVWHECCILWANGIYLVCGRL  
I3NC70 (1718-1966) TKPSVPTTSEGGPELEL-QIPELPLDSNERVWHECCILWANGIYLVCGRL  
F7CRS8 (1718-1967) SKPSVPTTSEGGPELEL-QIPELPLDSNERVWHECCILWANGIYLVCGRL  
E2RT08 (1689-1938) SKPSAPTTEGGPELEL-QIPELPLDSNERVWHECCILWANGIYLVCGRL  
G1P5A9 (1705-1953) SKPSVPTTSEGGPELEL-QIPELPLDSNERVWHECCILWANGIYLVCGRL  
E1B8T3 (1699-1947) SKPSVPTTSEGGPELEL-QIPELPLDSNERVWHECCILWANGIYLVCGRL  
G3UBA2 (1705-1954) SKPCVPTTSEGGPELEL-QIPELPLDSNERVWHECCILWANGIYLVCGRL  
G1LSB5 (1679-1927) PKPSVPTTSEGGPELEL-QIPELPLDSNERVWHECCILWANGIYLVCGRL  
Q9EPQ8 (1718-1962) TKPSVPTTSEGGPELEL-QIPELPLDSNERVWHECCILWANGIYLVCGRL  
G1SYZ5 (1632-1880) SKPEVPATSEGGPELEL-QIPELPLDSNERVWHECCILWANGIYLVCGRL  
H0VVM3 (1651-1885) TKPSVPTTSEGGPELEL-QIPELPLDSNERVWHECCILWANGIYLVCGRL  
F6Q9R3 (1692-1946) SKPAGFVSEGGPELEL-HIPELPLDSNELVWHECCVLWANGIYLVCGRL  
G3WLE0 (1668-1874) SKPAGFTEGGPELEL-HIPELPLDSNELVWHECCVLWANGIYLVCGRL  
H0ZHA4 (1664-1913) SKPSVPTS-EGGTELEL-QIPELPLDSNERVWHECCILWANGIYLVCGRL  
E1BXI6 (1671-1920) SKPSMPTS-EGGTELEL-QIPELPLDSNERVWHECCILWANGIYLVCGRL  
G1NHL2 (1672-1921) SKPSMPTS-EGGTELEL-QIPELPLDSNERVWHECCILWANGIYLVCGRL  
G1KC34 (1689-1937) SKPSMPTS-EGGPELEL-QIPELPLDSNERVWHECCILWANGIYLVCGRL  
F7BZK2 (1597-1840) S--SGPSTAEAGPEQCV-QIPOLPLDSNERVWHECCVLWANGVYLVCGRL  
I3JNR0 (1311-1549) --PPPPALDSLGLAQLAQLKMPMDPEELVWHECCIVWTSGVYLVNGRL  
D3ZG21 (1722-1965) TKPSVPTTSEGGPELEL-QIPELPLDSNERVWHECCILWANGIYLVCGRL  
G7PFP9 (1725-1980) SKPSVPTTSEGGPELEL-QIPELPLDSNERVWHECCILWANGIYLVCGRL  
H2P4M2 (1692-1935) SKPSVPTTSEGGPELEL-QIPELPLDSNERVWHECCILWANGIYLVCGRL  
H2ZXL0 (1628-1862) SNEQAPPT-EVSSEVGL-QIPELPLDSNERVWHECCILWANGVYLVCGRL  
G3I0E6 (721-964) TKPSVPTTSEGGPELEL-QIPELPLDSNERVWHECCILWANGIYLVCGRL  
G5BPR9 (1037-1303) TKPSMPTS-EGGPELEL-QIPELPLDSNERVWHECCILWANGIYLVCGRL  
Q4SCG6 (1995-2332) --PPPPALDSLGLAQLAQLKMPMDPEELVWHECCIVWTSGVYLVNGRL  
E7FE16 (2019-2336) --PPPPSLDALGPMALQALQLVPLDPEELVWHECCMVWTSGLIYLVNGRL  
F1SRF7 (1698-1893) SKPSVPTTSEGGPELEL-QIPELPLDSNERVWHECCILWANGIYLVCGRL  
H9KVS1 (1635-1821) SKPSVPTTSEGGPELEL-QIPELPLDSNERVWHECCILWANGIYLVCGRL  
Q7Z5J4 (1672-1906) AP-ADKGRKHECSK-EAPAEFGG--EAQERVWHEACAVWTGGVYLVAGKL  
H2QCD6 (1667-1901) AP-ADKGRKHECSK-EAPAEFGG--EAQERVWHEACAVWTGGVYLVAGKL  
F7E488 (1674-1909) AP-ADKGRKHECSK-EAPAEFGG--EAQERVWHEACAVWTGGVYLVAGKL  
H2NSX0 (1678-1908) AP-ADKGRKHECSK-EAPAEFGG--EAQERVWHEACAVWTGGVYLVAGKL  
G1RTB7 (1668-1903) AP-ADKGRKHECSK-EAPAEFGG--EAQERVWHEACAVWTGGVYLVAGKL  
E1B9X1 (1644-1885) AP-ADKSRKHECSK-EPPAEFGG--DTEQERVWHEACAVWTGGVYLVAGKL

D4A4Z4 (1638-1887) AP-ADKSRKHECSK-EAPAEFGG--DTEHVVVHEACAVWTSGVYLVAGKL  
Q61818 (1640-1889) AQ-ADKSRKHECSK-EAPTEFGG--DTEHVVVHEACAVWTSGVYLVAGKL  
G1LF06 (1637-1873) AP-ADKSRKHECSK-EPPAEFGG--DTEHVVVHEACAVWTSGVYLVAGKL  
G3QJR9 (1645-1879) AP-ADKGRKHECSK-EAPAEFGG--EAQEHVVVHEACAVWTSGVYLVAGKL  
G3TJ97 (1586-1821) AP-ADKSRKHECSK-EDSAEFGG--GTEHVVVHEACAVWTSGVYLVAGKL  
H0V1B2 (1316-1545) AP-VDKSRKHECSK-EAPAEFVG--DTEHVVVHEACAVWTSGVYLVAGKL  
I3N2I1 (1670-1914) AA-ADKSRKHECSR-EGPAEFGG--DTEHVVVHEACAVWTSGVYLVAGKL  
F7DZK3 (1652-1884) AP-ADKSRKHECSK-EPPAEFGG--DTEHVVVHEACAVWTSGVYLVAGKL  
E1BXD2 (1385-1610) AE---KPRRHECTKAESPPOEPAQDTEHVVVHEACAVWTSGVYLVAGKL  
G3PEF0 (1592-1819) ---DREGGDSMFERLQMEAEA-----KEHWAHENCALWTKGVILVAGRL  
H3D328 (1531-1756) ---DPEGKDSMLQRLRVOAEA-----NEHWTTHENCALWTKGILVAGRL  
E7F726 (1703-1936) ---GVEGIETSLQRLQMEAE-----KEHWAHENCALWTKGILVADKL  
C3Z7L5 (1697-1932) KVAARAKAGKEGGSPPCSLEAVVVPYLDVWTHDQCAVWASGVFIMGRL  
E2B1R7 (1229-1457) RNSVESNTN--AMFTGMTLLEG-EEQRWEVWLHEQCAVWAAGVYMAGGRV  
E2B1Q5 (1212-1434) RNSIESNTN--TIFTGMTLYEGGEEQRWEVWLHEQCAVWAAGVYMAGGRV  
F4W5Y0 (1113-1335) RNSVESNTN--VIFTGMTLHEGGEEQRWEVWLHEQCAVWAAGVYMAGGRV  
H9HN29 (1142-1364) RNSVESNTN--VIFTGMTLHEGGEEQRWEVWLHEQCAVWAAGVYMAGGRV  
H9K8F1 (1148-1369) RNSIESNTN--AMFTGMTVLEG-EEQRWEVWLHEQCAVWAAGVYMAGGRV  
G1MZ73 (1318-1538) AE---KPRRHECTKAESPPOEPAQDTEHVVVHEACAVWTSGVYLVAGKL  
F6TA33 (1577-1806) ---TEKPRRQCCKALEPPTI---ELETQEHVVVHEACAVWTSGVYLVAGKL  
G3XZQ6 (1102-1337) PA-ADKPRKHECSK-VEAPAEELSGDTEHVVVHEACAVWTSGVYLVAGKL  
G5BMW5 (1673-1926) AP-VDKSRKHECSK-EAPSEF--VGDTEHVVVHEACAVWTSGVYLVAGKL  
F6R4X5 (1594-1827) AA-ADK-----EHWVHEACAVWTSGVYLVAGKL  
F7B730 (1669-1926) AP-ADKGRRHECSK-EAPAEFGG--EAQEHVVVHEACAVWTSGVYLVAGKL  
E2RE72 (1543-1784) AP-ADK-----EHWVHEACAVWTSGVYLVAGKL  
H0Y065 (1671-1929) AP-ADKSRKHECSK-EAPAEFGG--DTEHVVVHEACAVWTSGVYLVAGKL  
H9G548 (1666-1853) ATASEKPRRHECSKADVP-LEDPAQDTEHVVVHEACAVWTSGVYLVAGKL  
H3AX41 (1594-1783) ---PEKSKSQCNQVDSQLGKP-VADSKHEHVEHSCVILWTCGVYLVAGKL  
G1NTH3 (1623-1838) APVADKTRKHECSK-EAPAEFGG--DTEHVVVHEACAVWTSGVYLVAGKL  
G3HHP8 (1539-1764) AP-ADKSRKHECSK-EAPAEFGG--DTEHVVVHEACAVWTSGVYLVAGKL  
Q6AWG9 (967-1203) VDPLDCSTES-KFVETFRGMGKTSSENGFEVWLHEDCAVWSNDIHLIGAHV  
Q16VV4 (907-1120) QFP-----DDIFYGMIKAGDDSYEVWVHEDCLVWAFGVHIIIGTRV  
B3NLN9 (1085-1322) VDPLDCSTES-KFVETFRGMGKTSSENGFEVWLHEDCAVWSNDIHLIGAHV  
B0W5K6 (960-1174) PPPP-----PDMFYGMVKAGEDSYEVWLHEDCLVWAFGVHIIIGTRI  
A7UTC0 (931-1162) QEPDQVVDVDR-SACEIFYGMVKASDNTYEVWVHEDCLVWAFGVYVIGTRI  
E3XES6 (921-1156) EEKDDDDQGOSSHTDVIFYGMMKASDNTYEVWVHEDCLVWAFGVYVIGTRV  
B4HNB7 (1026-1264) VDPLDCSTES-KFVETFRGMGKTSSENGFEVWLHEDCAVWSNDIHLIGAHV  
B4J9U8 (866-1104) VDPLDCSTES-KFVETFRGMGKTSSENGFEVWLHEDCAVWSNDIHLIGAHV  
B4J9G8 (1119-1356) QDPLDCSHT-KFVETFRGMSKTSSEHGYEIVWVHEDCAVWANDIQIIGAHV  
B4MYL6 (1108-1349) ADPLDYSQEN-KLVETFRGMCKTSEHGYEIVWLHEDCALWVNDIQIIGAHV  
B3MHU9 (1048-1286) MDPLDCSHT-KFVETFRGMGKTSSEHGYEIVWLHEDCAVWSNDIHLIGAHV

“PHD”

|                    | 5                       | 6           | 7       |
|--------------------|-------------------------|-------------|---------|
| Q9UGU0 (1690-1939) | YGLQEALETAREM--KCS----- | HCQEAG----- | ATLGCCY |
| G3QDX4 (1690-1939) | YGLQEALETAREM--KCS----- | HCQEAG----- | ATLGCCY |
| H2QLT9 (1692-1941) | YGLQEALETAREM--KCS----- | HCQEAG----- | ATLGCCY |
| H9FZ14 (1690-1939) | YGLQEALETAREM--KCS----- | HCQEAG----- | ATLGCCY |
| G1S175 (1688-1939) | YGLQEALETAREMPRSC-----  | HCTPAW----- | ATDRDL  |
| H0XML0 (1702-1951) | YGLQEALETAREM--KCS----- | HCQEAG----- | ATLGCCY |
| I3NC70 (1718-1966) | YGLQEALETAREM--KCS----- | HCQEAG----- | ATLGCCY |
| F7CRS8 (1718-1967) | YGLQEALETAREM--KCS----- | HCQEAG----- | ATLGCCY |
| E2RT08 (1689-1938) | YGLQEALETAREM--KCS----- | HCQEAG----- | ATLGCCY |
| G1P5A9 (1705-1953) | YGLQEALETAREM--KCS----- | HCQEAG----- | ATLGCCY |
| E1B8T3 (1699-1947) | YGLQEALETAREM--KCS----- | HCQEAG----- | ATLGCCY |
| G3U8A2 (1705-1954) | YGLQEALETAREM--KCS----- | HCQEAG----- | ATLGCCY |
| G1LSB5 (1679-1927) | YGLQEALETAREM--KCS----- | HCQEAG----- | ATLGCCY |
| Q9EPQ8 (1718-1962) | YGLQEALETAREM--KCS----- | HCQEAG----- | ATLGCCY |
| G1SYZ5 (1632-1880) | YGLQEALETAREM--KCS----- | HCQEAG----- | ATLGCCY |
| H0VVM3 (1651-1885) | YGLQEALETAREM--KCS----- | HCQEAG----- | ATLGCCY |
| F6Q9R3 (1692-1946) | YGLQEALETAREM--KCS----- | HCQEPG----- | ATLGCCY |
| G3WIE0 (1668-1874) | YGLQEALETAREM--KCS----- | HCQEPG----- | ATLGCCY |
| H0ZHA4 (1664-1913) | YGLQEALETAREM--KCS----- | HCQEPG----- | ATLGCCY |
| E1BXI6 (1671-1920) | YGLQEALETAREM--KCS----- | HCQEPG----- | ATLGCCY |
| G1NHL2 (1672-1921) | YGLQEALETAREM--KCS----- | HCQEPG----- | ATLGCCY |
| G1KC34 (1689-1937) | YGLQEALETAREM--KCS----- | HCQEPG----- | ATLGCCY |
| F7BZK2 (1597-1840) | YGLQEALETAREM--KCS----- | HCQEPG----- | ATLGCCY |
| I3JNR0 (1311-1549) | YGLQEALETAREM--KCS----- | HCQEPG----- | ATLGCCY |
| D3ZG21 (1722-1965) | YGLQEALETAREM--KCS----- | HCQEPG----- | ATLGCCY |
| G7PFP9 (1725-1980) | YGLQEALETAREM--KCS----- | HCQEPG----- | ATLGCCY |
| H2P4M2 (1692-1935) | YGLQEALETAREM--KCS----- | HCQEPG----- | ATLGCCY |
| H2ZXL0 (1628-1862) | YGLQEALETAREM--KCS----- | HCQEPG----- | ATLGCCY |
| G3IOE6 (721-964)   | YGLQEALETAREM--KCS----- | HCQEPG----- | ATLGCCY |
| G5BPR9 (1037-1303) | YGLQEALETAREM--KCS----- | HCQEPG----- | ATLGCCY |
| Q4SCG6 (1995-2332) | YGLQEALETAREM--KCS----- | HCQEPG----- | ATLGCCY |
| E7FE16 (2019-2336) | YGLQEALETAREM--KCS----- | HCQEPG----- | ATLGCCY |
| F1SRF7 (1698-1893) | YGLQEALETAREM--KCS----- | HCQEPG----- | ATLGCCY |

H9KVS1 (1635-1821) YGLOEALLETAREM-----  
Q7Z5J4 (1672-1906) FGLQEQAMKVAVDM--MCS-----SCQEA-----GATIGCC  
H2QCD6 (1667-1901) FGLQEQAMKVAVDM--MCS-----SCQEA-----GATIGCC  
F7E488 (1674-1909) FGLQEQAMKVAVDM--TCS-----SCQEA-----GATIGCC  
H2NSX0 (1678-1908) FGLQEQAMKVAVDM--TCS-----SCQEA-----GATIGCC  
G1RTB7 (1668-1903) FGLQEQAMKVAVDM--TCS-----SCQEA-----GATIGCC  
E1B9X1 (1644-1885) FGLQEQAMKVALDM--TCS-----SCQEA-----GATIGCC  
D4A4Z4 (1638-1887) FGLQEQAMKVAVDM--PCT-----SCHEEG-----ATISCS  
Q61818 (1640-1889) FGLQEQAMKVAVDM--PCT-----SCHEEG-----ATISCS  
G1LF06 (1637-1873) FGLQEQAMKVAVDM--ACF-----SCQEA-----GATIGCC  
G3QJR9 (1645-1879) FGLQEQAMKVAVDM--MCS-----SCHEA-----GATIGCC  
G3TJ97 (1586-1821) FGLQEQAMKVAVDM--TCS-----SCQEA-----GATIGCC  
H0V1B2 (1316-1545) FGLQEQAMKVAVDM--TCS-----SCQEA-----GATIGCC  
I3N2I1 (1670-1914) FGLQEQAMKVAVDM--TCS-----SCQEA-----GATIGCC  
F7DZK3 (1652-1884) FGLQEQAMKVAVDM--TCS-----SCQEA-----GATIGCC  
E1BXD2 (1385-1610) YGLOEAVKAAADLGKKCS-----SCQEA-----ATT-AG  
G3PEF0 (1592-1819) YGLREAVNNSAQT--SCY-----KCOIVG-----ASLNCC  
H3D3Z8 (1531-1756) YGLREAVNNSAQT--SCY-----KCOIVG-----ASLNCC  
E7F726 (1703-1936) FGLTEAVQKAAHA--KCS-----CQGEF-----ASVCCG  
C3Z7L5 (1697-1932) HGLDEAIKEARQH--SCS-----ECETVG-----ATLGGG  
E2BIR7 (1229-1457) TGLQEQAVWDAAKS--ICC-----SCGLTG-----ANIGCV  
E2B1Q5 (1212-1434) TGLQEQAVWDAAKS--ICD-----SCGLTG-----ANIGCV  
F4W5Y0 (1113-1335) TGLQEQAVWDAAKS--VCD-----SCGLTG-----ANIGCV  
H9HN29 (1142-1364) TGLQEQAVWDAAKS--VCD-----SCGLTG-----ANIGCV  
H9K8F1 (1148-1369) TGLQEQAVWDAAKS--ICD-----SCGLTG-----ANIGCV  
G1M273 (1318-1538) YGLOEAVKAAADL--KCS-----SCQEA-----ATVGGC  
F6TA33 (1577-1806) YGINSATQMAAAG--LCP-----KCORPG-----ATVGGC  
G3X2Q6 (1102-1337) FGLQEQAMKTAADV--RCS-----SCQVVG-----ATLGGC  
G5BMW5 (1673-1926) FGLQEQAMKVAVDM--VRG-----QPSGVT-----QLLGLGPS  
F6R4X5 (1594-1827) FGLQEQAMKTAADV--VRPSLG--APALAP-----SSLDAV  
F7B730 (1669-1926) FGLQEQAMKVAVDM--HGGAV--VLAPGGISLLSLRL--TSLFQGPS  
E2RE72 (1543-1784) FGLQEQAMKVAVDM--ESG--MPLMCGGRASVQATDF--VSLFRGPP  
H0Y065 (1671-1929) FGLQEQAMKVAIDM--VRGQP--CGVACDSSK--PRLRQKDLLETR-S  
H9G548 (1666-1853) YGLOEAIKMAANL--VRP-----VSLN--  
H3AX41 (1594-1783) YGLREAVIETAITV-----VSLN--  
G1NTH3 (1623-1838) FGLQEQAMKVALDM--TCS-----SCQEA-----GATIGCC  
G3HHP8 (1539-1764) FGLQEQAMKVAVDM--PCS-----SCHEAG-----ATISCS  
Q6AWG9 (967-1203) NGLDAAVWDSTRY--OCV-----LCQQTG-----ASICCF  
Q16VV4 (907-1120) VGLEAAIWNCCRH--QCR-----ICSHHG-----ATVGCCL  
B3NLN9 (1085-1322) NGLDAAVWDESTRY--OCV-----LCQQTG-----ASICCF  
B0W5K6 (960-1174) VGLEAAIWNCCRH--PCR-----ICGHSF-----AVVSCCL  
A7UTC0 (931-1162) VGLEAAIWNCCRH--OCQ-----LCRNYG-----AVLSCLL  
E3XES6 (921-1156) IGLEAAIWNCCRH--RCQ-----LCSQYG-----AVVCCCL  
B4HNB7 (1026-1264) NGLDAAVWDSTRY--OCV-----LCQQTG-----ASICCF  
B4QBU9 (866-1104) NGLDAAVWDSTRY--OCV-----LCQQTG-----ASICCF  
B4J9G8 (1119-1356) NGLDAAVWDSTRY--OCV-----HCAQSG-----ANVCCF  
B4MYL6 (1108-1349) NGLDAAVWDSTRY--OCV-----HCSQTF-----ANVCCF  
B3MHU9 (1048-1286) NGLDAAVWDSTRY--OCV-----LCQQSG-----ANICCF

“PHD”

|                    | 8   | 9       | 10        |
|--------------------|-----|---------|-----------|
| Q9UGU0 (1690-1939) | NKG | CSFR    | YHYPCAIDA |
| G3QDX4 (1690-1939) | NKG | CSFR    | YHYPCAIDA |
| H2QLT9 (1692-1941) | NKG | CSFR    | YHYPCAIDA |
| H9FZ14 (1690-1939) | NKG | CSFR    | YHYPCAIDA |
| G1S175 (1688-1939) | NGI | CHFLGLH | CPVEMDA   |
| H0XML0 (1702-1951) | NKG | CSFR    | YHYPCAIDA |
| I3NC70 (1718-1966) | NKG | CSFR    | YHYPCAIDA |
| F7CRS8 (1718-1967) | NKG | CSFR    | YHYPCAIDA |
| E2RT08 (1689-1938) | NKG | CSFR    | YHYPCAIDA |
| G1P5A9 (1705-1953) | NKG | CSFR    | YHYPCAIDA |
| E1B8T3 (1699-1947) | NKG | CSFR    | YHYPCAIDA |
| G3U8A2 (1705-1954) | NKG | CSFR    | YHYPCAIDA |
| G1LSB5 (1679-1927) | NKG | CSFR    | YHYPCAIDA |
| Q9EPQ8 (1718-1962) | NKG | CSFR    | YHYPCAIDA |
| G1SYZ5 (1632-1880) | NKG | CSFR    | YHYPCAIDA |
| H0VVM3 (1651-1885) | NKG | CSFR    | YHYPCAIDA |
| F6Q9R3 (1692-1946) | NKG | CSFR    | YHYPCAIDA |
| G3WLE0 (1668-1874) | NKG | CSFR    | YHYPCAIDA |
| H0ZHA4 (1664-1913) | NKG | CSFR    | YHYPCAIDA |
| E1BXI6 (1671-1920) | NKG | CSFR    | YHYPCAIDA |
| G1NHL2 (1672-1921) | NKG | CSFR    | YHYPCAIDA |
| G1KC34 (1689-1937) | NKG | CSFR    | YHYPCAIDA |
| F7BZK2 (1597-1840) | NKG | CACC    | YHYPCAMDS |
| I3JNR0 (1311-1549) | SKG | CTLR    | YHYLCAIEA |
| D3ZG21 (1722-1965) | NKG | CSFR    | YHYPCAIDA |
| G7PPF9 (1725-1980) | NKG | CSFR    | YHYPCAIDA |



H2P4M2 (1692-1935) NKG-----CSFR-YHYPCAIIDA-----  
 H2ZXL0 (1628-1862) SKG-----CSFR-YHYPCAKEA-----  
 G3I0E6 (721-964) NKG-----CSFR-YHYPCAIIDA-----  
 G5BPR9 (1037-1303) NKG-----CSFR-YHYPCAIIDAGGQLHQALLLFLDRR  
 Q4SCG6 (1995-2332) SKG-----CTLR-YHYLCATEA-----  
 E7FE16 (2019-2336) SKG-----CTLR-YHYI CAIDA-----  
 F1SRF7 (1698-1893) -----  
 H9KVS1 (1635-1821) -----  
 Q7Z5J4 (1672-1906) HKG-----CLHT-YHYPCASDAG-----  
 H2QCD6 (1667-1901) HKG-----CLHT-YHYPCASDAG-----  
 F7E488 (1674-1909) HKG-----CIHT-YHYPCASDAG-----  
 H2NSX0 (1678-1908) HKG-----CIHT-YHYPCASDAG-----  
 G1RTB7 (1668-1903) HKG-----CIHT-YHYPCASDAG-----  
 E1B9X1 (1644-1885) HKG-----CLHT-YHYPCASDAG-----  
 D4A4Z4 (1638-1887) YEG-----CTHT-YHYPCANDTG-----  
 Q61818 (1640-1889) YKG-----CIHT-YHYPCANDTG-----  
 G1LF06 (1637-1873) QKG-----CTHT-YHYPCASDAG-----  
 G3QJR9 (1645-1879) HKG-----CLHT-YHYPCASDAG-----  
 G3TJ97 (1586-1821) HKG-----CVHT-YHYPCASDAG-----  
 H0V1B2 (1316-1545) YKG-----CIHT-YHYPCASDAG-----  
 I3N2I1 (1670-1914) YKG-----CVHS-YHYPCASDAG-----  
 F7DZK3 (1652-1884) QKG-----CIHT-YHYPCASDAG-----  
 E1BXD2 (1385-1610) GRG-----CPHM-LS---PFPTG-----  
 G3PEF0 (1592-1819) WRG-----CSHK-YHYVCAKEIG-----  
 H3D328 (1531-1756) WRG-----CSHK-YHYVCAKEIG-----  
 E7F726 (1703-1936) WKS-----CTQS-YHYI CAKESG-----  
 C3Z7L5 (1697-1932) FKG-----CQLK-YHYVCAVDAG-----  
 E2BIR7 (1229-1457) KRG-----CKAV-SHYPCALTKG-----  
 E2B1Q5 (1212-1434) KRG-----CKAV-THYPCALTKG-----  
 F4W5Y0 (1113-1335) KRG-----CKAV-SHYPCALTKG-----  
 H9HN29 (1142-1364) KRG-----CKAV-SHYPCALTKG-----  
 H9K8F1 (1148-1369) KRG-----CKAV-IHYPCALTKG-----  
 G1MZ73 (1318-1538) QKG-----CPHT-YHYCAVDTG-----  
 F6TA33 (1577-1806) HKG-----CEQS-YHITCAVEAAG-----  
 G3X2Q6 (1102-1337) HKG-----CPQT-YHYCASDTG-----  
 G5BMW5 (1673-1926) WSKSFAGKSP--LYF--C---RRVPAARKPG-----  
 F6R4X5 (1594-1827) SPGGRWEGAFVLVTGFQ--AAWD-SVLAQASAPG-----  
 F7B730 (1669-1926) WPG-----CPLL-AMSTPSSWARVYV-PAAKKPG-----  
 E2RE72 (1543-1784) WP-----CPAV-PAASLSDSWAGVPVPAAKKPG-----  
 H0Y065 (1671-1929) WRL-----CPSS-AVHLPPLFIRHVPVVRNPG-----  
 H9G548 (1666-1853) -----  
 H3AX41 (1594-1783) -----C-----  
 G1NTH3 (1623-1838) HKG-----CAHT-YHYPCASDAG-----  
 G3HHP8 (1539-1764) YKG-----CIHT-YHYPCANDTG-----  
 Q6AWG9 (967-1203) QRC-----CKAA-AHVPCARSDN-----  
 Q16VV4 (907-1120) QRC-----CSEE-AHVVCARRND-----  
 B3NLN9 (1085-1322) QRC-----CKAA-AHVPCARSDN-----  
 B0W5K6 (960-1174) RRG-----CNAE-AHVVCARKHD-----  
 A7UTC0 (931-1162) HOG-----CHAK-AHFICAHKQH-----  
 E3XES6 (921-1156) ROQ-----CTAK-AHFICAHKQN-----  
 B4HNB7 (1026-1264) QRC-----CKAA-AHVPCARSDN-----  
 B4QBU9 (866-1104) QRC-----CKAA-AHVPCARSDN-----  
 B4J9G8 (1119-1356) QRA-----CKAA-AHVPCARVAS-----  
 B4MYL6 (1108-1349) QRS-----CKAT-AHVPCARSDN-----  
 B3MHU9 (1048-1286) QRC-----CKAP-AHVPCARSDN-----

**“PHD”**

11 12

Q9UGU0 (1690-1939) -----DCLLHEENFSVRCPKHKPPLPCP  
 G3QDX4 (1690-1939) -----DCLLHEENFSVRCPKHKPPLPCP  
 H2QLT9 (1692-1941) -----DCLLHEENFSVRCPKHKPPLPCP  
 H9FZ14 (1690-1939) -----DCLLHEENFSVRCPKHKPPLPCP  
 G1S175 (1688-1939) -----YCLLHEENFSVRCPKHKPPLPCP  
 H0XML0 (1702-1951) -----DCLLHEENFSVRCPKHKPPLPCP  
 I3NC70 (1718-1966) -----DCLLHEENFSVRCPKHKPPLPCP  
 F7CRS8 (1718-1967) -----DCLLHEENFSVRCPKHKPPLPCP  
 E2RT08 (1689-1938) -----DCLLHEENFSVRCPKHKPPLPCP  
 G1P5A9 (1705-1953) -----DCLLHEENFSVRCPKHKPPLPCP  
 E1B8T3 (1699-1947) -----DCLLHEENFSVRCPKHKPPLPCP  
 G3U8A2 (1705-1954) -----DCLLHEENFSVRCPKHKPPLPCP  
 G1LSB5 (1679-1927) -----DCLLHEENFSVRCPKHKPPLPCP  
 Q9EPQ8 (1718-1962) -----DCLLHEENFSVRCPKHK---CP  
 G1SYZ5 (1632-1880) -----DCLLHEENFSVRCPKHKPPLPCP  
 H0VVM3 (1651-1885) -----DCLLHEENFSVRCPKHKPPLPCP  
 F6Q9R3 (1692-1946) -----DCLLHEENFSVRCPKHKPPLPCS  
 G3WIE0 (1668-1874) -----DCLLHEENFSVRCPKHKPPLPCS  
 H0ZHA4 (1664-1913) -----DCLLHEENFSVRCPKHKPPLPCS

```

E1BXI6 (1671-1920) -----DCLLNNEENFSVRCPKHKPLLECS
G1NHL2 (1672-1921) -----DCLLNNEENFSVRCPKHKPLLECS
G1KC34 (1689-1937) -----DCLLNNEENFSVRCPKHKPLLECS
F7BZK2 (1597-1840) -----ECLLNNEENFSVRCPKHKIPISSS
I3JNR0 (1311-1549) -----DCSLNEDNFSLRCPKHKFVFFPP
D3ZG21 (1722-1965) -----DCLLHEENFSVRCPKHK-----
G7PFP9 (1725-1980) GETVKKNKRDCLLHEENFSVRCPKHK-----
H2P4M2 (1692-1935) -----DCLLHEENFSVRCPKHK-----
H2ZXL0 (1628-1862) -----ECFLSEENFSMRCRKHK-----
G3IOE6 (721-964) -----DCLLHEENFSVRCPKHK-----
G5BPR9 (1037-1303) LPVQRCQSPDCLLHEENFSVRCPKHK-----
Q4SCG6 (1995-2332) -----DCSLNEDNFSLRCPKHK-----
E7FE16 (2019-2336) -----DCSLNEDNFSLRCPKHK-----
F1SRF7 (1698-1893) -----
H9KVS1 (1635-1821) -----
Q7Z5J4 (1672-1906) -----CIFIEENFSLKCPKHKR-LE--
H2QCD6 (1667-1901) -----CIFIEENFSLKCPKHKR-LE--
F7E488 (1674-1909) -----CIFIEENFSLKCPKHKR-LEL-
H2NSX0 (1678-1908) -----CIFIEENFSLKCPKHKR-LEL-
G1RTE7 (1668-1903) -----CIFIEENFSLKCPKHKR-LEL-
E1B9X1 (1644-1885) -----CIFIEENFSLKCPKHKR-LEL-
D4A4Z4 (1638-1887) -----CTFIEENFTLKCPKHKR-LEL-
Q61818 (1640-1889) -----CTFIEENFTLKCPKHKR-LEL-
G1LF06 (1637-1873) -----CILIEENFSLKCPKHKRSLPA-
G3QJR9 (1645-1879) -----CIFIEENFSLKCPKHKR-LE--
G3TJ97 (1586-1821) -----CIFMEENFSLKCPKHKR-LEL-
H0V1B2 (1316-1545) -----CVFIEENFSLKCPKHKR-LEL-
I3N2I1 (1670-1914) -----CVFIEENFSLKCPKHK-----
F7DZK3 (1652-1884) -----CIFIEENFSLKCPKHK-----
E1BXD2 (1385-1610) -----CLITEESFSLRCPKHKVS-PE-
G3PEF0 (1592-1819) -----CTFHEDDFS LKCPKHEQL-E--
H3D328 (1531-1756) -----CTFHEDDFS LKCPKHEVIK---
E7F726 (1703-1936) -----CTFEEETFSLRCPKHHRVSV--
C3Z7L5 (1697-1932) -----CCLISEENFSLMCOYOHKHKTIRF
E2BIR7 (1229-1457) -----WHLD TNQYI PKCNLERVT----
E2B1Q5 (1212-1434) -----WHLD TNQYI PKCNLERVT----
F4W5Y0 (1113-1335) -----WHLD TNQYI PKCNLERVT----
H9HN29 (1142-1364) -----WHLD TNQYI PKCNLERVT----
H9K8F1 (1148-1369) -----WHLD INQYI PKCNLERIT----
G1M273 (1318-1538) -----CLLIEECFSLRCPKHKDI-EL-
F6TA33 (1577-1806) -----CCLISEENFSLRCPKHHRVKIV-
G3X2Q6 (1102-1337) -----CILVEENFSLKCPKHKLI-P--
G5BMW5 (1673-1926) -----PPLGAPTKDASTPTTTTV---EVM
F6R4X5 (1594-1827) -----PPLAAATKDV LKPTTTTV---EVT
F7B730 (1669-1926) -----PPLGAATKDASTPTITRV---EAM
E2RE72 (1543-1784) -----PPSGAATKDAPTPTITRV---EAM
H0Y065 (1671-1929) -----PPSGAATKDVSTLTITRV---EVM
H9G548 (1666-1853) -----
H3AX41 (1594-1783) -----
G1NTH3 (1623-1838) -----
G3HHP8 (1539-1764) -----KS-----
Q6AWG9 (967-1203) -----WSLSEEDRKVYCHLERHE-EGV
Q16VV4 (907-1120) -----WELS-DEFKSHCEKHSKTDSS-
B3NLN9 (1085-1322) -----WSLSEEDRKVYCOLERHQ-PEI
B0W5K6 (960-1174) -----WELS-DEFKAHCKDESEGDS-
A7UTC0 (931-1162) -----WKL T-EDFQSFCDRESGHSGGS
E3XES6 (921-1156) -----WKL T-DEYQAFCEVEAMKEEGS
B4HNB7 (1026-1264) -----WSLSEEDRKVYCOLERHEPDVV
B4QBU9 (866-1104) -----WSLSEEDRKVYCOLERHEPDVV
B4J9G8 (1119-1356) -----WSLSEEDRKVYCOLERAPQKAKE
B4MYL6 (1108-1349) -----WHLNEHERKVECOLERGPSEGS
B3MHU9 (1048-1286) -----WSLSEEDRKVHCOLERSGESGVA

```

Figure S1
